# Supplementary material for: Electroencephalograph with Remote Interpretation for Emergency Care: A Prospective Clinical Trial
Source: Research Square preprint supplement (doi:10.21203/rs.3.rs-7021174/v1), 2025-10-01
Supplement: Supplementary file 1 [file 459f30665ba226ce4bd70974.docx]

Supplemental TABLE 1. Overall diagnoses made by four epileptologists.

|  | Epileptologist 1 | | Epileptologist 2 | | Epileptologist 3 | | Epileptologist 4 | |
| --- | --- | --- | --- | --- | --- | --- | --- | --- |
| Case | Conventional EEG | Join-EEG | Conventional EEG | Join-EEG | Conventional EEG | Join-EEG | Conventional EEG | Join-EEG |
| 1 | Normal | Normal | Normal | Normal | Normal | Normal | Artifact | Artifact |
| 2 | Normal | Normal | ED | ED | Normal | Normal | Artifact | Normal |
| 3 | ED | ED | NCSE | NCSE | NCSE | NCSE | ED | ED |
| 4 | Seizure | Seizure | Seizure | Seizure | Seizure | Seizure | Seizure | Seizure |
| 5 | Normal | Normal | Normal | Normal | Normal | Normal | Normal | Artifact |
| 6 | ED | ED | ED | ED | ED | ED | Normal | Normal |
| 7 | Normal | Normal | Normal | Normal | Normal | Normal | Normal | Normal |
| 8 | NCSE | NCSE | NCSE | NCSE | NCSE | NCSE | NCSE | NCSE |
| 9 | Normal | Normal | Normal | Normal | Normal | Normal | Normal | Normal |
| 10 | Artifact | Artifact | Normal | Normal | Normal | Normal | Artifact | Normal |

ED: epileptiform discharge, NCSE: non-convulsive status epilepticus
